# Supplementary material for: Genome-Wide Characterization and Expression Profiles of the Superoxide Dismutase Gene Family inGossypium
Source: Hindawi journal article supplement (doi:10.1155/2016/8740901), 2016-01-01
Supplement: f1 [file 8740901.f1.pdf]

1 **Supplemental figure and table legends**

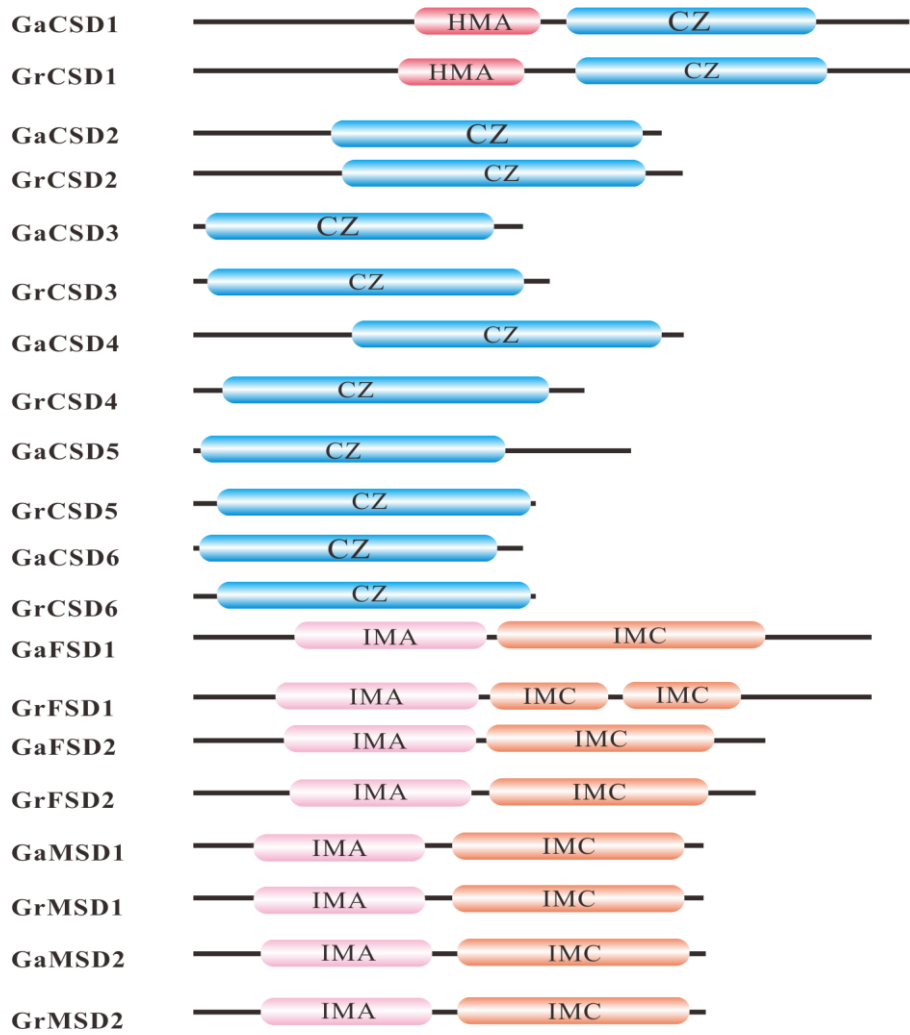

2

3 **Supplementary Figure S1** Domain analysis of SOD genes in cotton

4

5 **Supplementary Table S1.** The duplicated genes of SOD gene family and their date of duplication

6 events

| Gene pairs |        | ka     | ks     | Ka/ks | T= Ks/2λ  |
|------------|--------|--------|--------|-------|-----------|
| GaCSD2     | GaCSD6 | 0.039  | 0.5586 | 0.07  | 18.62Mya  |
| GaCSD3     | GaCSD5 | 0.0975 | 0.3729 | 0.26  | 12.43Mya  |
| GaFSD1     | GaFSD2 | 0.4156 | 0.9221 | 0.45  | 30.73Mya  |
| GaMSD1     | GaMSD2 | 0.0429 | 0.4071 | 0.11  | 13.57Mya  |
| GrCSD2     | GrCSD6 | 0.0328 | 0.4939 | 0.07  | 16.46Mya  |
| GrCSD3     | GrCSD4 | 0.6042 | 0.5853 | 1.03  | 19.51Mya  |
| GrCSD3     | GrCSD5 | 0.0662 | 0.3630 | 0.18  | 12.1Mya   |
| GrCSD1     | GrCSD6 | 0.4787 | 0.2739 | 1.75  | 9.13Mya   |
| GrFSD1     | GrFSD2 | 0.4136 | 0.9845 | 0.42  | 32.827Mya |
| GrMSD1     | GrMSD2 | 0.0529 | 0.4198 | 0.13  | 13.99Mya  |

7

1 **Supplementary Table S2.** The sequences of the 14 motifs by motif analysis of *GaSOD* genes.

| Motif No. | Length (aa) | E-value   | Multilevel Consensus Sequence                                                                                                                                                                                           | No. of SOD proteins in which motif is present | SOD proteins in which motif is present                                          |
|-----------|-------------|-----------|-------------------------------------------------------------------------------------------------------------------------------------------------------------------------------------------------------------------------|-----------------------------------------------|---------------------------------------------------------------------------------|
| Motif 1   | 91          | 5.4E-514  | [PA]HFNP[ANL][GKNR][KM][ETD]HGAP[ES]D[EGV][NVE]RHAGDLGN[IV][ITV][AV][GN][ADP]DG[VCS]A[ES][AFV][ST][VKT]D[KNW]QIPL[ST]G[PQ][NH][SA][IV][ILV]GRA[VF]VVH[AE][DL][PE]DDLKGGHEL S[KL][TS]TGNAG[GAR][VL][AG]CG[IV][I]V]GL[QT] | 10                                            | GaCSD1,GaCSD2, GaCSD3,GaCSD5 GaCSD6,GrCSD1, GrCSD2,GrCSD3 GrCSD5,GrCSD6         |
| Motif 2   | 42          | 1.00E-156 | [AQ][TY][FY][SEG]L[KP][DAT][LP]PY[DN]P][LY][GDN][AD]LEP[AHY][IM]S[GKR][ER][IAT][LM][QE][LVY]H[HW][GQ][KV]HH [QR][TD][YF][IV][TDE]N[LY]NK[AQ]                                                                            | 8                                             | GaFSD1,GaFSD2, GaMSD1,GaMSD2 GrFSD1,GrFSD2, GrMSD1,GrMSD2                       |
| Motif 3   | 41          | 1.40E-213 | [LF]TQEGDGPTTV[NT][GV][NR][ST]GL[ KTS]PGLHGFH[LV]H[EA][LY]GDTTNGC MSTG                                                                                                                                                  | 11                                            | GaCSD2,GaCSD3, GaCSD4,GaCSD5 GaCSD6,GrCSD1, GrCSD2,GrCSD3 GrCSD4,GrCSD5, GrCSD6 |
| Motif 4   | 47          | 2.20E-131 | GG[EDG][PKM]P[HKNS][GAL][SDG]L[GL] [WDE][ALQ][DE][TR][DHN]FGS[FL][ET][ SNR][FL][IR][EQ][KE][FM][NKV][AE][AE] [AG][AL][AST][LQ][FQ]GSGW[VA]WL[GA V][LVY][KDN][KAR][ENQ]                                                  | 8                                             | GaFSD1,GaFSD2, GaMSD1,GaMSD2 GrFSD1,GrFSD2, GrMSD1,GrMSD2                       |
| Motif 5   | 31          | 6.00E-123 | [PT][IKLN][GV][PW][DHN][LDY][VFI]P[LI] L[GNT][IL]D[VM]WEHAYYL[DQ][YF][K Q]N[VD][RK][PA][DR]Y[LI]                                                                                                                        |                                               | GaFSD1,GaFSD2, GaMSD1,GaMSD2 GrFSD1,GrFSD2, GrMSD1,GrMSD2                       |
| Motif 6   | 41          | 1.00E-72  | QLH[DE]AIQKGDSSTVVKLQSAIKFNGGG H[IV]NHSIFWKNLAPI                                                                                                                                                                        | 4                                             | GaMSD1,GaMSD2. GrMSD1,GrMSD2                                                    |
| Motif 7   | 29          | 5.20E-51  | TYN[KN]G[DN][IP]LP[AE]FNNA[EQ][AV] WNHDFWESM[KQP]                                                                                                                                                                       | 4                                             | GaFSD1,GaFSD2, GrFSD1,GrFSD2                                                    |
| Motif 8   | 41          | 1.30E-46  | L[PS][RN][QP][SV][LV][SR][IL][AL][AG][T N][IS]P[KV]K[QT][FM][SN][VE][AFL][AL] [VE][QST][KT][KG][AR][VK]A[VR]L[KI]G[ DNQ][SG][EKV][VP]E[GD][VF][VL][TV]                                                                  |                                               | GaCSD3,GaCSD4, GaCSD5,GrCSD3 GrCSD4,GrCSD5                                      |
| Motif 9   | 21          | 2.80E-40  | [KV][NF][IMV][WE]K[VL][IV][NS]W[KE][ YT][AV][SN][ET][VR][YL]EK[EA][CKS]A                                                                                                                                                | 6                                             | GaFSD1,GrFSD1, GaMSD1,GaMSD2 GrMSD1,GrMSD2                                      |
| Motif 10  | 80          | 1.40E-27  | TLDVDKNGE[AS]FYTG[VE]KQLRVADL IGRSIAVYETEDRSDPGLTAAVIARSAGVG ENYKKICACDGTIWEASDKDFVT[ST]K                                                                                                                               | 2                                             | GaCSD4,GrCSD4                                                                   |
| Motif 11  |             | 3.10E-27  | RNSSHFPAKSLPFLSPPNRLGL[IT]RNF ATSP[IT]ALNMDSPS[ST][HN]HNPSQENG SLPDLLTEYMVDMKCEGCVTAVKNKLQT V                                                                                                                           | 2                                             | GaCSD4,GrCSD4                                                                   |
| Motif 12  | 21          | 4.80E-23  | [MA]A[LT][RT]S[LMS][VA]T[RS][KLR]T[L F]T[LI][AGP][LS][NL][SG]TRL                                                                                                                                                        | 6                                             | GaFSD1,GrFSD1, GaMSD1,GaMSD2 GrMSD1,GrMSD2                                      |
| Motif 13  | 41          | 5.20E-16  | RAAEREMEEERRRKEEEEEGKPTNEE[DE] DDDDLEMYVDNDND                                                                                                                                                                           | 2                                             | GaFSD1,GrFSD1                                                                   |
| Motif 14  | 15          | 2.50E-15  | K[AKP][LV][VA][VL][LE][ST][ST]F[EN][G Q][VD][SP][LG][TV]                                                                                                                                                                | 11                                            | GaCSD2,GaCSD3, GaCSD5,GaCSD6 GrCSD2,GrCSD3, GrCSD6,GaMSD1 GaMSD2,GrMSD1, GrMSD2 |

**Supplementary Table S3.** List of primers used in quantitative real time-PCR expression analysis.

| Name   | Forward primers (5'- 3') | Reverse primers (5'- 3') |
|--------|--------------------------|--------------------------|
| GaCSD1 | CCCTGATGGAGTTGCTGAGG     | CCTGCATTCCCTGTCGTCTT     |
| GaCSD2 | CTACCGTGACTGGGAACCTTT    | CACAGCCATCATCACCAACAG    |
| GaCSD3 | ACCCACCGGTTCTTTTCTCC     | GTCAACGTGACAACGCCTTC     |
| GaCSD4 | ACCTGGAAAACACGGTTGGT     | AAACAGCTATTGACCGCCCA     |
| GaCSD5 | CAGCCACTTCTCACATTATCTCC  | AGAACTTGTGGGTCTGAAGGGTT  |
| GaCSD6 | TCAACAGGACCTCACTCAA      | ACGACCGCTCTTCCAATA       |
| GaFSD1 | CCCCTTGTTTGGGACTACTT     | TCGGTTTGCCCTCTTCTT       |
| GaFSD2 | ATTGGGGTGTGCATCATCGT     | TCATGGTCCACACCTCTGC      |
| GaMSD1 | TGAGCCTCCACATGGTTCTTTG   | ATCCTGATTTGCAGTGGTTTCG   |
| GaMSD2 | CACGATGCTGCTGCCTCTGTC    | ACCTCCGCCGTTGAACTTGAT    |
